# Supplementary material
Source: MDPI journal article supplement (https://www.mdpi.com/2073-4441/15/12/2282)
Supplement: s1 [file s1]

# Macrophyte- and macrozoobenthic-based assessment in rivers: specificity of response to physico-chemical stressors

Emilia Varadinova<sup>1,2</sup>, Gana Gecheva<sup>3\*</sup>, Violeta Tyufekchieva<sup>2</sup>, Tanya Milkova<sup>4</sup>

## Supplementary Materials

**Table S1:** Study sites with indicated geographic coordinates, altitude, river type, and ecological quality ratio (EQR) sorted by type (natural and HMWB) of water body; MPH—macrophytes; MZB—macrozoobenthos. Legend for river type: R1—alpine rivers; R3—mountainous rivers; R4/5—semi-mountainous rivers; R7—large Danube tributaries; R8—medium and small Danube rivers; R9—Dobrudzha degrading rivers; R10—large Black Sea rivers; R11—small and medium Black Sea rivers; R12—large lowland rivers; R13—small and medium lowland rivers; R15—karst springs; R16—Black Sea river estuaries. The EQR color scale represents the ecological status/potential as follows: blue—high, green—good, yellow—moderate, orange—poor.

| No | River site                                      | Latitude<br>(N) | Longitude<br>(E) | Altitude<br>(m a.s.l.) | River<br>Type | Natural/<br>HMWB | EQR-<br>MPH | EQR-<br>MZB |
|----|-------------------------------------------------|-----------------|------------------|------------------------|---------------|------------------|-------------|-------------|
| 1  | Stryama River, Manole Village                   | 42.287848       | 24.912821        | 190                    | R13           | Natural          | Poor        | High        |
| 2  | Bunovitsa River, before Topolnitsa River        | 42.61505        | 24.010267        | 481                    | R5            | Natural          | Poor        | High        |
| 3  | Kamchiya River, Grozdyovo Village               | 43.033455       | 27.554753        | 21                     | R10           | Natural          | Moderate    | High        |
| 4  | Kamchiya River, Venelin Village                 | 43.036131       | 27.675437        | 15                     | R10           | Natural          | Moderate    | High        |
| 5  | Karaagach River, Fazanovo Village               | 42.19488        | 27.74791         | 7                      | R11           | Natural          | Moderate    | High        |
| 6  | Tundzha River, Srem Village, before bridge      | 42.062633       | 26.47655         | 89                     | R12           | Natural          | Moderate    | High        |
| 7  | Karst spring of Maarata River, Krushuna Village | 43.14765        | 25.020051        | 144                    | R15           | Natural          | Moderate    | High        |
| 8  | Lisovo Dere River, near Kiten Town              | 42.158786       | 27.864125        | 5                      | R16           | Natural          | Moderate    | High        |
| 9  | Butamyata River, liman                          | 42.053667       | 27.98565         | 1                      | R16           | Natural          | Moderate    | High        |

|    |                                                      |           |           |      |     |         |      |      |
|----|------------------------------------------------------|-----------|-----------|------|-----|---------|------|------|
| 10 | Rusokastrenska River,<br>Trastikovo Village          | 42.42503  | 27.25981  | 10   | R11 | Natural | Poor | Good |
| 11 | Devnenska River, mouth                               | 43.179109 | 27.626486 | 4    | R15 | Natural | Poor | Good |
| 12 | Tundzha River, Yagoda<br>Village, old bridge         | 42.32745  | 25.33805  | 307  | R5  | Natural | Poor | Good |
| 13 | Chairluk River,<br>Cherkovna Village                 | 43.60609  | 26.63787  | 268  | R9  | Natural | Poor | Good |
| 14 | Asenovska River, Sliven<br>Town                      | 42.687583 | 26.283617 | 290  | R3  | HMWB    | Poor | High |
| 15 | Struma River, before<br>Belishka River               | 41.63314  | 23.19722  | 129  | R5  | HMWB    | Poor | High |
| 16 | Provadiyska River,<br>upstream Provadiya<br>Town     | 43.20507  | 27.43465  | 42   | R11 | HMWB    | Poor | Good |
| 17 | Lesnovska River, before<br>inflow into Iskar River   | 42.46819  | 23.22279  | 492  | R4  | HMWB    | Poor | Good |
| 18 | Kamchia River,<br>Shalamanovo Village                | 43.176949 | 26.992634 | 71   | R4  | HMWB    | Poor | Good |
| 19 | Struma River, Topolnitsa<br>Village                  | 41.415    | 23.31859  | 75   | R5  | HMWB    | Poor | Good |
| 20 | Potoka River, before<br>Saedinenie Town              | 42.297901 | 24.524951 | 248  | R13 | Natural | High | Good |
| 21 | Maritsa River, Dolna<br>Banya Village                | 42.315418 | 23.73362  | 733  | R3  | Natural | High | Good |
| 22 | Stryama River, Slatina<br>Village                    | 42.690594 | 24.568402 | 518  | R5  | Natural | High | Good |
| 23 | Retidge River, above<br>WHPS                         | 41.72808  | 23.55775  | 1622 | R1  | Natural | Good | High |
| 24 | Blagoevgradska Bistritsa<br>River, after Bodrost hut | 42.03098  | 23.27414  | 896  | R1  | Natural | Good | High |
| 25 | Vlachinska River, before<br>Sinanitsa River          | 41.73778  | 23.2297   | 479  | R1  | Natural | Good | High |
| 26 | Veleka River, Brodilovo<br>Village                   | 43.081503 | 27.860311 | 56   | R10 | Natural | Good | High |
| 27 | Sredetska River,<br>Valchanovo Village,<br>bridge    | 42.31228  | 27.04267  | 45   | R11 | Natural | Good | High |

|    |                                               |           |           |      |     |         |          |          |
|----|-----------------------------------------------|-----------|-----------|------|-----|---------|----------|----------|
| 28 | Silistar River, upstream delta                | 42.02268  | 27.9994   | 10   | R11 | Natural | Good     | High     |
| 29 | Tundzha River, Samuilovo Village              | 42.583833 | 26.322233 | 153  | R12 | Natural | Good     | High     |
| 30 | Matnitsa River, before Perelik Village        | 41.49506  | 23.86401  | 486  | R13 | Natural | Good     | High     |
| 31 | Mochura River                                 | 41.62     | 23.45251  | 1653 | R13 | Natural | Good     | High     |
| 32 | Iztok River, before Mesta River               | 41.89277  | 23.54382  | 759  | R15 | Natural | Good     | High     |
| 33 | Petrovska River, before river mouth           | 41.40653  | 23.43201  | 174  | R15 | Natural | Good     | High     |
| 34 | Veleka River, bridge to the road E87          | 42.060853 | 27.966979 | 4    | R16 | Natural | Good     | High     |
| 35 | Chepelarska River, after Bachkovo Village     | 41.963868 | 24.864603 | 375  | R3  | Natural | Good     | High     |
| 36 | Bezbozhka River, before river mouth           | 41.81934  | 23.62031  | 705  | R3  | Natural | Good     | High     |
| 37 | Mesta River, Gospodintsi Village              | 41.6543   | 23.73337  | 548  | R5  | Natural | Good     | High     |
| 38 | Maritsa River, Plovdiv Town                   | 42.153263 | 23.745178 | 193  | R12 | Natural | Good     | Moderate |
| 39 | Senkyovitsa River, Golyama Voda Village       | 43.56678  | 26.83259  | 305  | R9  | Natural | Good     | Moderate |
| 40 | Ovcharitsa River, Prohorovo Village           | 42.3536   | 26.207933 | 175  | R13 | Natural | Good     | Moderate |
| 41 | Kamchiya River, Poda                          | 43.021014 | 27.820399 | 30   | R10 | Natural | Moderate | Good     |
| 42 | Maritsa River, Parvomai Village               | 42.116009 | 24.212368 | 158  | R12 | Natural | Moderate | Good     |
| 43 | Stryama River, Banya Village                  | 42.5203   | 24.8476   | 300  | R5  | Natural | Moderate | Good     |
| 44 | Fandakliyska River, near Shkorpilovtsi Resort | 42.957343 | 27.896283 | 1    | R16 | Natural | Moderate | Poor     |
| 45 | Stryama River, Razheno Konare Village         | 42.33452  | 24.803253 | 230  | R13 | Natural | Poor     | Moderate |
| 46 | Dobrichka River, bridge between Rosenovo and  | 43.644784 | 27.76255  | 183  | R9  | Natural | Poor     | Moderate |

|    |                                                         |           |              |      |     |      |          |          |
|----|---------------------------------------------------------|-----------|--------------|------|-----|------|----------|----------|
|    | Kozloduytsi Village                                     |           |              |      |     |      |          |          |
| 47 | Bebresh River, Scravena Village                         | 42.57185  | 23.4586      | 301  | R4  | HMWB | High     | Good     |
| 48 | Arkata River, before Struma River                       | 42.48029  | 22.91527     | 625  | R13 | HMWB | Good     | High     |
| 49 | Aheloi River, mouth                                     | 42.634128 | 27.640458    | 3    | R16 | HMWB | Good     | High     |
| 50 | Yadenitsa River, after Yundola Resort                   | 42.101138 | 23.889909    | 1190 | R3  | HMWB | Good     | High     |
| 51 | Aitoska River, downstream Kameno Village                | 42.56893  | 27.3094      | 10   | R11 | HMWB | Good     | Moderate |
| 52 | Maritsa River, Ognyanovo Village, after Luda Yana River | 42.14411  | 24.412279    | 220  | R12 | HMWB | Good     | Moderate |
| 53 | Shavarna River, before inflow of Osam River             | 43.20432  | 25.0717      | 66   | R8  | HMWB | Good     | Moderate |
| 54 | Cherni Lom River, before inflow in Banski Lom River     | 43.32377  | 25.57649     | 90   | R8  | HMWB | Good     | Moderate |
| 55 | Sredetska River, Sredets Town, Avramov bridge           | 42.3672   | 27.23407     | 7    | R11 | HMWB | Moderate | Good     |
| 56 | Maritsa River, Stamboliyski Town, the bridge            | 42.151781 | 24.553512    | 200  | R12 | HMWB | Moderate | Good     |
| 57 | Maritsa River, Govedare Village                         | 43.143761 | 24.418989    | 220  | R12 | HMWB | Moderate | Good     |
| 58 | Kamchiya River, before Veliki Preslav Town              | 43.153979 | 227.82765037 | 92   | R4  | HMWB | Moderate | Good     |
| 59 | Vit River, after Gulyantsi Village                      | 43.38027  | 24.4186      | 29   | R7  | HMWB | Moderate | Good     |
| 60 | Vit River, after Dolna Mitropoliya Town                 | 43.29601  | 24.33865     | 49   | R7  | HMWB | Moderate | Good     |
| 61 | Yantra River, Draganovo Village                         | 43.12369  | 2544390      | 43   | R7  | HMWB | Moderate | Good     |
| 62 | Suha River, Novo Botevo Village                         | 43.47901  | 27.71176     | 207  | R9  | HMWB | Moderate | Good     |
| 63 | Provadiyska River, downstream Provadia                  | 43.12592  | 27.47614     | 18   | R11 | HMWB | Moderate | Poor     |

| Town |                                                                       |              |           |     |     |         |          |          |
|------|-----------------------------------------------------------------------|--------------|-----------|-----|-----|---------|----------|----------|
| 64   | Aidere River, Stoilovo Village                                        | 43.033247    | 27.512782 | 319 | R15 | Natural | High     | High     |
| 65   | Maritsa River, Raduil Village                                         | 42.281648    | 23.685428 | 911 | R3  | Natural | High     | High     |
| 66   | Ropotamo River, Veselie Village                                       | 42.3108      | 27.62393  | 25  | R11 | Natural | Good     | Good     |
| 67   | Dvoinitsa River, before Popovich Village                              | 42.8465      | 27.74782  | 27  | R11 | Natural | Good     | Good     |
| 68   | Tundzha River, Elhovo Town                                            | 42.170433    | 26.55885  | 102 | R12 | Natural | Good     | Good     |
| 69   | Ropotamo River, Velyov Vir                                            | 42.22957     | 27.708078 | 13  | R16 | Natural | Good     | Good     |
| 70   | Razhdavitsa River, Dobrinishte Town                                   | 41.82771     | 23.55849  | 837 | R5  | Natural | Good     | Good     |
| 71   | Provadiyska River, Sindel Village                                     | 43.11702     | 27.59857  | 7   | R11 | Natural | Moderate | Moderate |
| 72   | Zlatna Panega Rivers, spring                                          | 43.5304      | 24.9381   | 181 | R15 | Natural | Moderate | Moderate |
| 73   | Ropotamo River, bridge to the road E87                                | 42.302385    | 27.727823 | 10  | R16 | Natural | Moderate | Moderate |
| 74   | Karaagach River, mouth                                                | 42.225089    | 27.7771   | 5   | R16 | Natural | Moderate | Moderate |
| 75   | Tsaratsar River, downstream confluence of Voyka River                 | 43.71585     | 26.76286  | 191 | R9  | Natural | Moderate | Moderate |
| 76   | Tsaratsar River, Ludogortsi Village                                   | 43.64223     | 26.78365  | 259 | R9  | Natural | Moderate | Moderate |
| 77   | Kamchiya River, Avren Village                                         | 43.050038    | 27.596853 | 404 | R10 | HMWB    | Good     | Good     |
| 78   | Izvorska River, upstream delta between Dimchevo and Tvarditsa Village | 42.38941     | 27.43721  | 26  | R11 | HMWB    | Good     | Good     |
| 79   | Maritsa River, Pazardzik Town                                         | 42.185517    | 24.31011  | 205 | R12 | HMWB    | Good     | Good     |
| 80   | Kamchiya River, after Ticha Reservoir                                 | 43.093610226 | 7.9536085 | 185 | R4  | HMWB    | Good     | Good     |

|    |                                                                             |          |          |     |    |      |          |          |
|----|-----------------------------------------------------------------------------|----------|----------|-----|----|------|----------|----------|
| 81 | Lefedzha River,<br>Bryagovitsa Village,<br>before Inflow in Yantra<br>River | 43.11461 | 25.53043 | 131 | R7 | HMWB | Good     | Good     |
| 82 | Suha River, downstream<br>Odrintsi Reservoir                                | 43.53071 | 27.70287 | 179 | R9 | HMWB | Moderate | Moderate |
| 83 | Beli Lom River, after<br>Razgrad Town                                       | 43.3292  | 26.28713 | 270 | R7 | HMWB | Bad      | Bad      |

**Table S2:** List of macrophyte species (nomenclature after Hill et al. [35] for mosses and Euro + Med PlantBase [36] for vascular plants) and their codes.

| Non Vascular plants                             | Code    |
|-------------------------------------------------|---------|
| <b>Mosses</b>                                   |         |
| <i>Platyhypnidium riparioides</i> (Hedw.) Dixon | PLA.RIP |
| <b>Vascular plants</b>                          |         |
| <b>Pteridophytes</b>                            |         |
| <i>Equisetum</i> sp.                            | EQU.SPX |
| <b>Hydrophytes</b>                              |         |
| <i>Ceratophyllum demersum</i>                   | CER.DEM |
| <i>Ceratophyllum submersum</i>                  | CER.SUB |
| <i>Elodea canadensis</i>                        | ELO.CAN |
| <i>Lemna minor</i>                              | LEM.MIN |
| <i>Lemna gibba</i>                              | LEM.GIB |
| <i>Lemna polyrhiza</i>                          | LEM.POL |
| <i>Myriophyllum spicatum</i>                    | MIR.SPI |
| <i>Najas marina</i>                             | NAJ.MAR |
| <i>Potamogeton berchtoldii</i>                  | POT.BER |
| <i>Potamogeton crispus</i>                      | POT.CRI |
| <i>Potamogeton pectinatus</i>                   | POT.PEC |
| <i>Potamogeton pusillus</i>                     | POT.PUS |
| <i>Potamogeton nodosus</i>                      | POT.NOD |
| <i>Ranunculus</i> sp.                           | RAN.SPX |
| <i>Spirodela polyrhiza</i>                      | SPR.POL |
| <i>Vallisneria spiralis</i>                     | VAL.SPI |
| <b>Hygrophytes</b>                              |         |
| <i>Bidens tripartite</i>                        | BID.TRI |
| <i>Bidens frondosus</i>                         | BID.FRO |
| <i>Cyperus longus</i>                           | CYP.LON |
| <i>Myosoton aquaticum</i>                       | MYS.AQU |
| <i>Paspalum paspalodes</i>                      | PAS.PAS |
| <i>Petasites hybridus</i>                       | PET.HYB |
| <i>Polygonum lapathifolium</i>                  | POL.LAP |
| <i>Polygonum mite</i>                           | POL.MIT |
| <i>Polygonum</i> sp.                            | POL.SPX |

|                              |         |
|------------------------------|---------|
| <i>Ranunculus repens</i>     | RAN.REP |
| <i>Ranunculus sceleratus</i> | RAN.SCE |
| <i>Scirpus maritimus</i>     | SCI.MAR |

---

### Helophytes

---

|                                    |         |
|------------------------------------|---------|
| <i>Alisma lanceolatum</i>          | ALI.LAN |
| <i>Alisma plantago-aquatica</i>    | ALI.PLA |
| <i>Berula erecta</i>               | BER.ERE |
| <i>Butomus umbellatus</i>          | BUT.UMB |
| <i>Cyperus fuscus</i>              | CYP.FUS |
| <i>Cyperus glomeratus</i>          | CYP.GLO |
| <i>Echinochloa crus-galli</i>      | ECH.GRU |
| <i>Glyceria fluitans</i>           | GLY.FLU |
| <i>Iris pseudacorus</i>            | IRI.PSE |
| <i>Lycopus europaeus</i>           | LYC.EUR |
| <i>Lythrum salicaria</i>           | LYT.SAL |
| <i>Mentha aquatica</i>             | MEN.AQU |
| <i>Mentha longifolia</i>           | MEN.LON |
| <i>Nasturtium officinale</i>       | NAS.OFF |
| <i>Polygonum hydropiper</i>        | POL.HYD |
| <i>Phragmites australis</i>        | PHR.AUS |
| <i>Rorippa amphibian</i>           | ROR.AMP |
| <i>Sagittaria latifolia</i>        | SAG.LAT |
| <i>Sparganium erectum</i>          | SPA.ERE |
| <i>Scirpus lacustris</i>           | SCI.LAC |
| <i>Typha angustifolia</i>          | TYP.ANG |
| <i>Typha latifolia</i>             | TYP.LAT |
| <i>Typha laxmannii</i>             | TYP.LAX |
| <i>Veronica anagallis-aquatica</i> | VER.ANA |
| <i>Veronica beccabunga</i>         | VER.BEC |
| <i>Juncus effuses</i>              | JUN.EFF |
| <i>Juncus maritimus</i>            | JUN.MAR |

---
